# Supplementary material for: Adjusted spectral correction method for calculating extreme winds in tropical cyclone affected water areas
Source: Copernicus journal article supplement (doi:10.5194/wes-2022-64), 2022-07-15
Supplement: Supplementary file [file wes-2022-64-RC1-supplement.pdf]

The authors developed a method to calculate the extreme wind for tropical cyclone affected water areas and the results are in agreement with Ott (2005) over their study domain. The paper is an interesting work as this method can be applied for all water areas with tropical cyclones and be used to obtain extreme winds from surface to a few hundreds of meters. However, some detailed information are missed in the manuscript, which makes it hard for reading. Therefore, I recommend minor revision including the implementation of the points and comments below.

- (1) In page 6 line 139, it says that “ we use the n-r relation from the grid point (17N, 130E) ”, it is highly suggested to plot this point in Figure 3a.
- (2) The curve of the relationship between  $u_{\max}$  and  $r$  at the grid point (17N, 130E) should be added, so the source of the Eq. (6) can be clear to the readers. Meanwhile, the annual wind maximum  $u_{\max}$  in Eq. (6) refers to the uncorrected annual maximum wind extracted from the CFSR data?
- (3) In page 7 line 150, it says “ Fig. 4b shows the inter-relationship between  $n$ ,  $r$  and  $u$ .”, however, the red curve line in Fig. 4b only refers to the dependence of  $n$  on  $r$ . Meanwhile, the caption of Fig 4b “The derived dependence of  $n$  on  $r$  as in Eq.4” should be modified as “The derived dependence of  $n$  on  $r$  as in Eq.5”.
- (4) The meaning of  $k$  and its value in Eq. (7), Eq. (9) and Eq. (10) should be added. Is it different from  $\alpha_{ch}$  in Eq. (8)?
- (5) Please check the description in page 10 line 216, “the use of Eq. 4 has...” or “the use of Eq. 5 has ...”?
